# Supplementary material for: Naturally Derived Phenethyl Isothiocyanate Modulates Induction of Oxidative Stress via Its N-Acetylated Cysteine Conjugated form in Malignant Melanoma
Source: MDPI journal article supplement (doi:10.3390/antiox13010082), 2024-01-08
Supplement: s1 [file s1]

# Supplementary Material

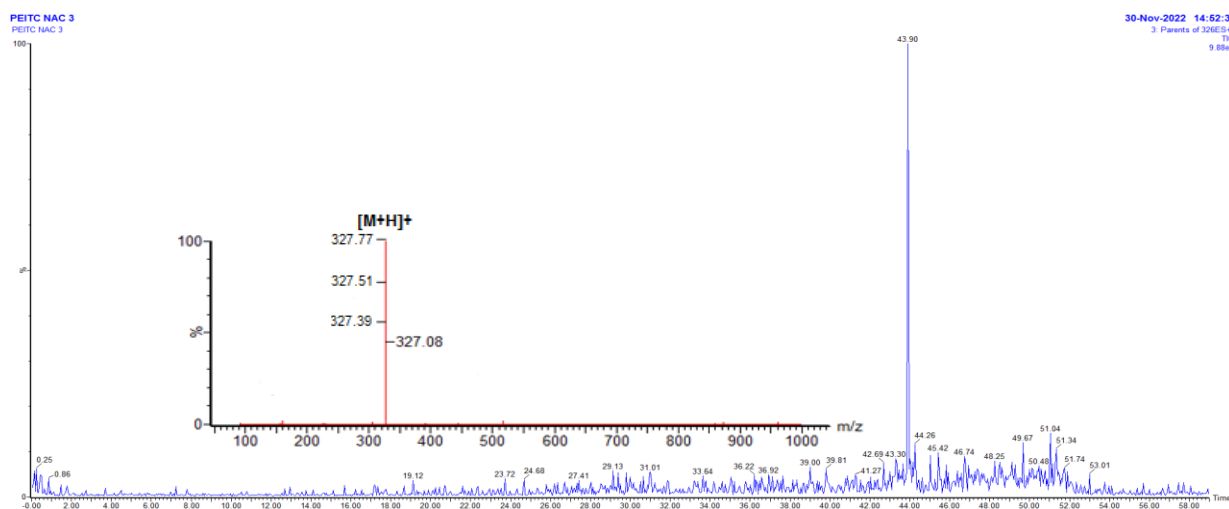

**Figure S1:** Mass spectrum of the synthesised PEITC-NAC conjugate.

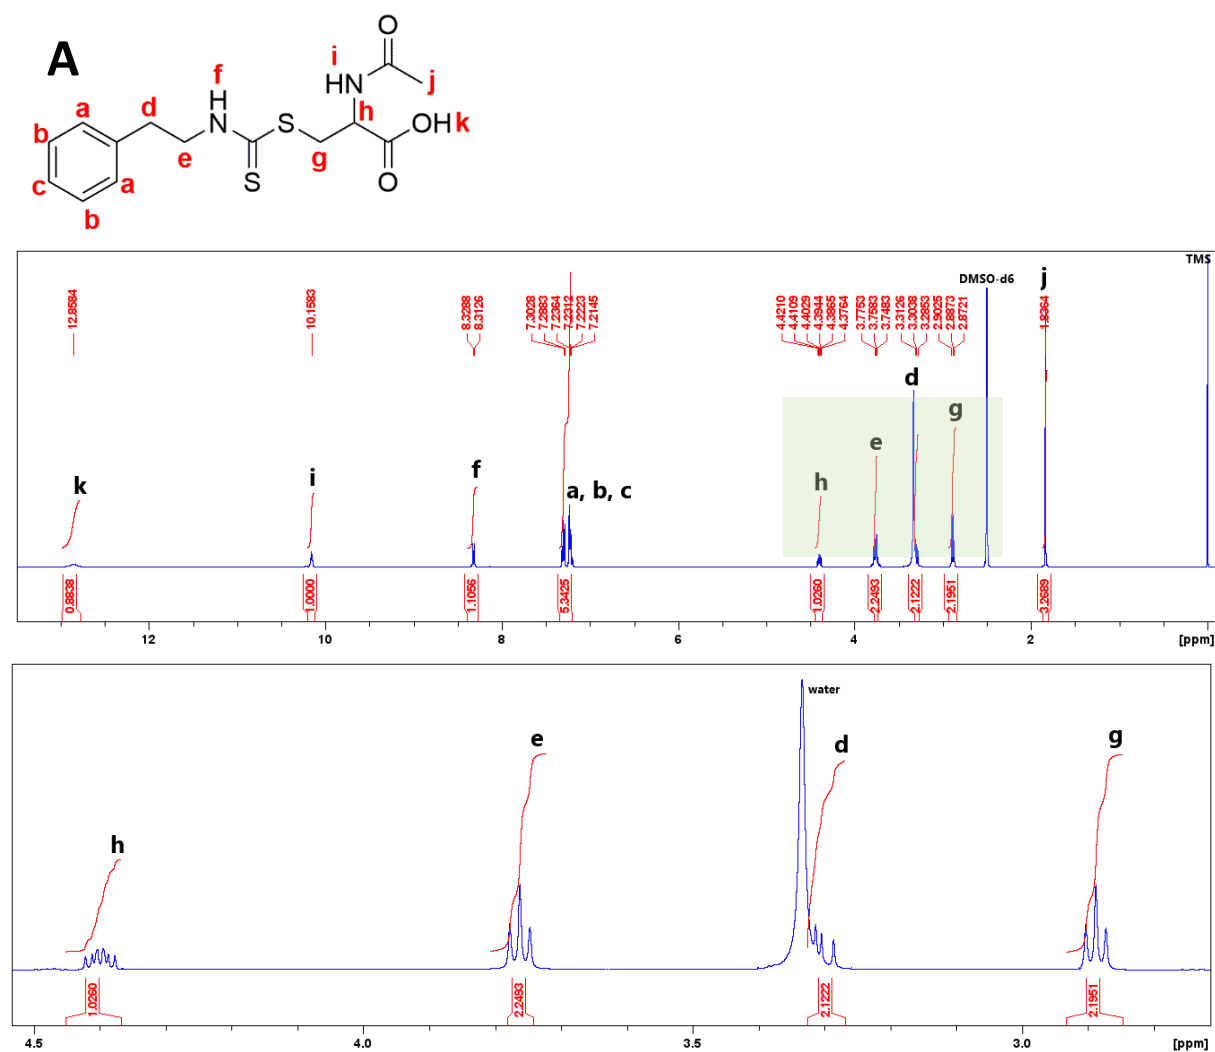

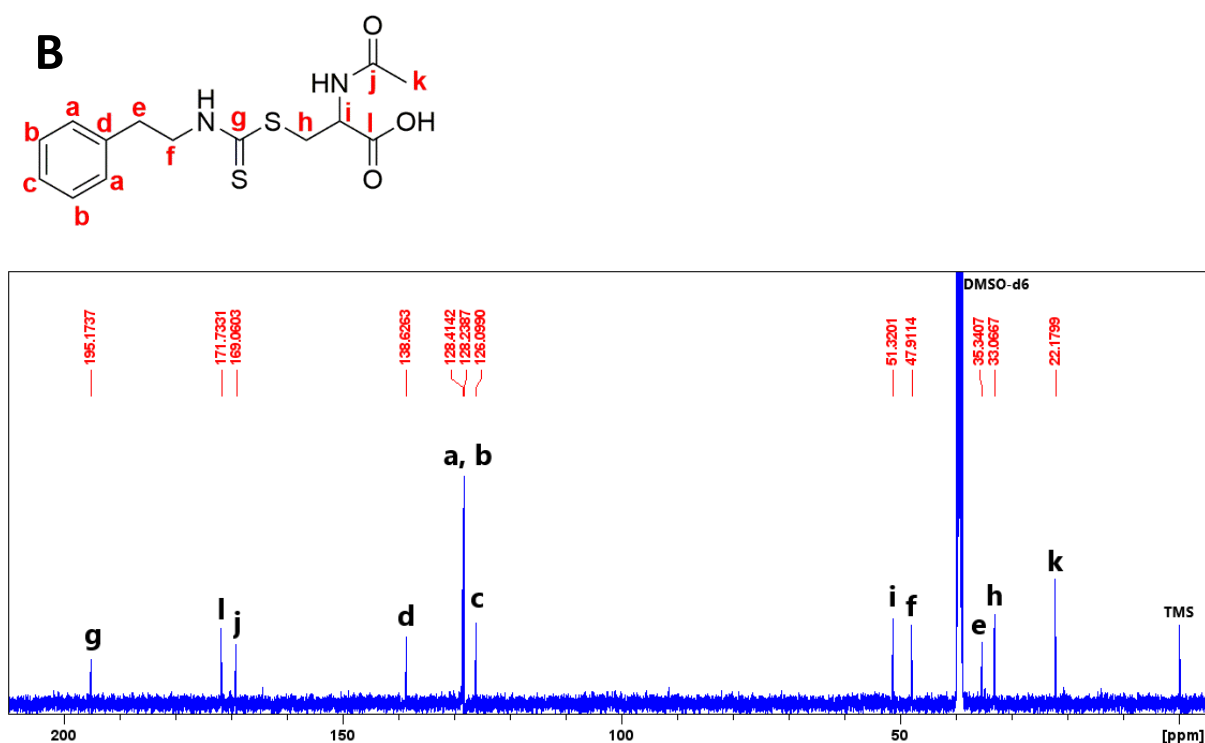

**Figure S2:**  $^1\text{H}$ -NMR (A) and  $^{13}\text{C}$ -NMR (B) spectra of  $N_\alpha$ -acetyl-S-(N-phenethylthiocarbamoyl)-glutathione at 500 MHz and 100 MHz in DMSO- $d_6$  respectively.

**Table S1:** Multiple reaction monitoring conditions for  $N_\alpha$ -acetyl-S-(N-phenethylthiocarbamoyl)-glutathione in UPLC-MS/MS analysis

| Compound                                                    | Chemical formula                                                   | MW         | [M-H] <sup>+</sup><br>(m/z) | MS <sup>2</sup><br>fragment<br>s<br>(m/z) | Cone<br>voltage<br>e (V) | Collision<br>energy<br>(eV) | Retention<br>time (R <sub>t</sub> )<br>(min) |
|-------------------------------------------------------------|--------------------------------------------------------------------|------------|-----------------------------|-------------------------------------------|--------------------------|-----------------------------|----------------------------------------------|
| $N_\alpha$ -acetyl-S-(N-phenethylthiocarbamoyl)-glutathione | $\text{C}_{14}\text{H}_{18}\text{N}_2\text{O}_3$<br>S <sub>2</sub> | 326.4<br>3 | 327.7<br>7                  | 197.42                                    | 15                       | 23                          | 43.9                                         |

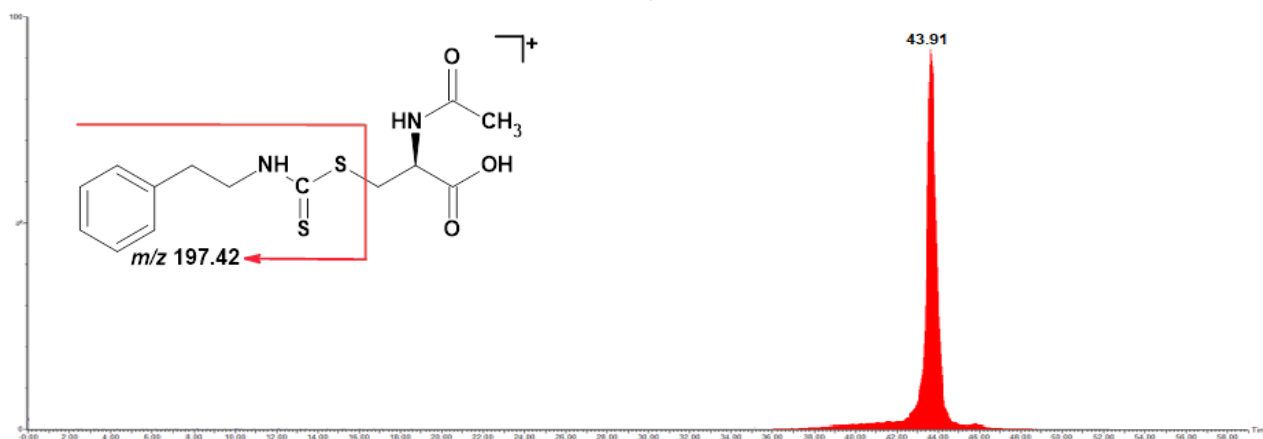

**Figure S3:** Extracted UPLC- ESI-(+)-MS/MS chromatogram of  $N_{\alpha}$ -acetyl-S-(N-phenethylthiocarbamoyl)-glutathione.

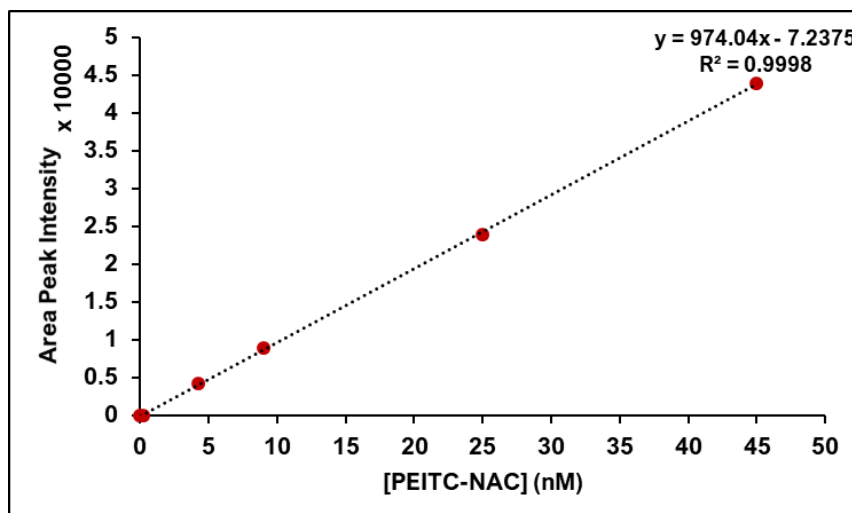

**Figure S4:** Calibration curve of  $N_{\alpha}$ -acetyl-S-(N-phenethylthiocarbamoyl)-glutathione standard at various concentrations (0.1-45 nM) used for the determination of the mercapturic acid end-product in intracellular space and culture medium.

**Table S2:** The limit of detection (LOD), quantification (LOQ), linearity, precision and accuracy results for  $N_{\alpha}$ -acetyl-S-(N-phenethylthiocarbamoyl)-glutathione. The calibration equations represent the peak area as a function of concentration in nM. The intra- and inter- day experimental data have been collected over a six days experiment. The % recovery data represent means of three independent experiments.

| Compound                                                      | Linear range (nM) | LoD (nM) | LoQ (nM) | Calibration equation <sup>a</sup> | Correlation coefficient (r <sup>2</sup> ) | %RSD                     |                          | %REC <sup>d</sup> |
|---------------------------------------------------------------|-------------------|----------|----------|-----------------------------------|-------------------------------------------|--------------------------|--------------------------|-------------------|
|                                                               |                   |          |          |                                   |                                           | (intra-day) <sup>b</sup> | (inter-day) <sup>c</sup> |                   |
| $N_{\alpha}$ -acetyl-S-(N-phenethylthiocarbamoyl)-glutathione | 0.21-45           | 0.21     | 6.93     | y = 974.04x - 7.235               | 0.9998                                    | 0.96                     | 2.56                     | 98.8              |

<sup>a</sup> Chromatographic peak area (y) as a function of nM concentration (x)

<sup>b</sup> Values are means of intra-day assays (n=6)

<sup>c</sup> Values are means of inter-day assays (n=6)

<sup>d</sup> (n=3)

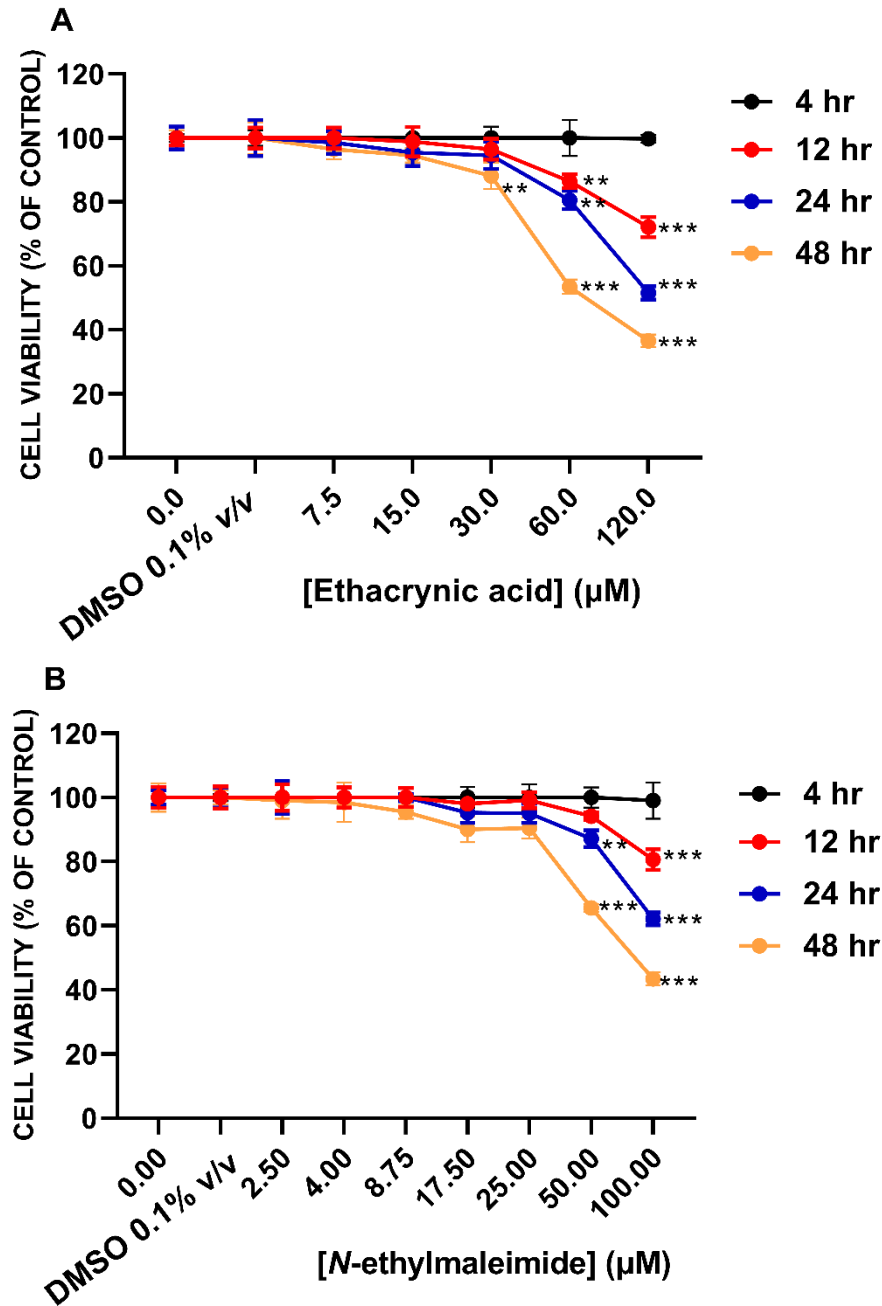

**Figure S5:** Cytotoxicity profiles of A375 cells subjected to either ethacrynic acid (0-120  $\mu\text{M}$ ) (A) or N-ethylmaleimide (0- 100  $\mu\text{M}$ ) (B) over 4-48 hr of exposure. Data are expressed as means  $\pm$  SEM of three independent experiments. *n.d.* represents data not determined. Statistical significance is indicated by \*\*at  $p < 0.01$ , \*\*\*at  $p < 0.001$  relative to corresponding controls (DMSO 0.1% *v/v*).

**Table S3:** Calculated EC<sub>50</sub> values for ethacrynic acid and *N*-ethylmaleimide, in all cell lines, at different time point of exposure by utilizing an online EC<sub>50</sub> calculator platform (Very Simple IC<sub>50</sub> Tool Kit, available online: <http://www.ic50.tk/> (accessed on 14 April 2023)).

| Time (hr) | Ethacrynic acid       | <i>N</i> -ethylmaleimide |
|-----------|-----------------------|--------------------------|
|           | EC <sub>50</sub> (μM) |                          |
| 4         | n.d.                  | n.d.                     |
| 12        | n.d.                  | n.d.                     |
| 24        | 114.98±4.21           | n.d.                     |
| 48        | 55.48±1.25            | 83.56±2.64               |
